# Supplementary material
Source: Springer Nature journal article supplement (https://www.springermedizin.de/resource/supplementary/12936_2010_1379_MOESM5_ESM.pdf/9549660)
Supplement: MOESM5 [file 9549660]

496 patients with discrepant 1<sup>st</sup> and 2<sup>nd</sup> microscopy results

197 discrepant by presence/absence of asexual

CareStart:  
28 *P. falciparum*  
46 *P. vivax*  
75 Mixed  
48 Negative

ICT Combo  
24 *P. falciparum*  
46 *P. vivax*  
79 Mixed  
48 Negative

ParaScreen  
25 *P. falciparum*  
52 *P. vivax*  
78 Mixed  
42 Negative

Final microscopy results:  
71 *P. falciparum*  
25 *P. vivax*  
0 Mixed  
101 Negative

155 discrepant by species identified

CareStart:  
9 *P. falciparum*  
17 *P. vivax*  
128 Mixed  
1 Negative

ICT Combo  
3 *P. falciparum*  
17 *P. vivax*  
134 Mixed  
1 Negative

ParaScreen  
4 *P. falciparum*  
13 *P. vivax*  
137 Mixed  
1 Negative

Final microscopy results:  
123 *P. falciparum*  
25 *P. vivax*  
0 Mixed  
7 Negative

143 discrepant by >50% difference in parasite count

CareStart:  
12 *P. falciparum*  
87 *P. vivax*  
41 Mixed  
3 Negative

ICT Combo  
7 *P. falciparum*  
88 *P. vivax*  
46 Mixed  
2 Negative

ParaScreen  
8 *P. falciparum*  
88 *P. vivax*  
46 Mixed  
1 Negative

Final microscopy results:  
53 *P. falciparum*  
76 *P. vivax*  
0 Mixed  
14 Negative
